# Supplementary material for: Polyol and sugar osmolytes can shorten protein hydrogen bonds to modulate function
Source: PubMed Central journal article supplement (PMC7511342; doi:10.1038/s42003-020-01260-1), 2020-09-23
Supplement: 42003_2020_1260_MOESM1_ESM.pdf [file 42003_2020_1260_MOESM1_ESM.pdf]

1 Polyol and Sugar Osmolytes can Shorten Protein Hydrogen Bonds to Modulate  
2 Function

3

4 Jingwen Li,<sup>†,‡,⊥</sup> Jingfei Chen,<sup>†,‡,⊥</sup> Liaoyuan An,<sup>†,‡,§</sup> Xiaoxiang Yuan,<sup>†,‡,§</sup> and Lishan  
5 Yao<sup>\*,†,‡</sup>

6 <sup>†</sup> Key Laboratory of Biofuels and <sup>‡</sup> Shandong Provincial Key Laboratory of Synthetic  
7 Biology, Qingdao Institute of Bioenergy and Bioprocess Technology, Chinese  
8 Academy of Sciences, Qingdao, 266101, China

9 <sup>§</sup> University of Chinese Academy of Sciences, Beijing, 100049, China

10

11

12

13

14 Supporting Information

15

16 **Supplementary Figures**

17

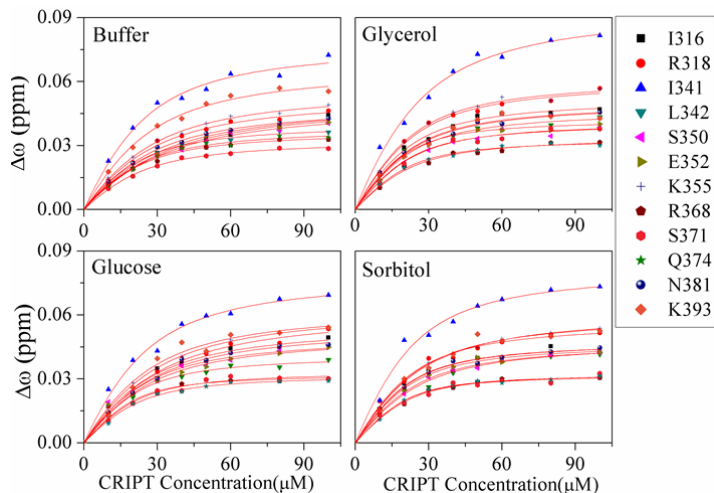

18

19

20 Supplementary Figure 1. Profiles of weighted chemical shift changes  $\Delta\omega$  ( $\Delta\omega =$   
21  $[(\Delta\omega_H)^2 + (0.1 * \Delta\omega_N)^2]^{0.5}$ ) of different PDZ3 residues in the titration of CRIPT peptide.  
22 The red lines are the best fitted lines to eq. S1.

23

24

25

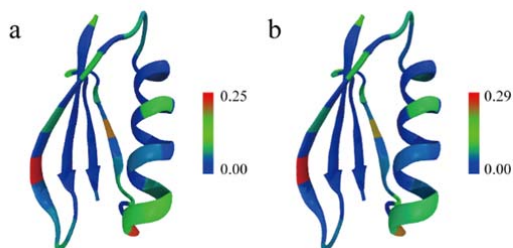

26

27 Supplementary Figure 2. Sorbitol (a) and glucose (b) accessibility to the protein  
28 backbone. The accessibility is calculated by the number of sorbitol and glucose  
29 molecules within 5 Å from the backbone C $\alpha$  of each residue and averaged over two  
30 50 ns MD trajectories.

31

32

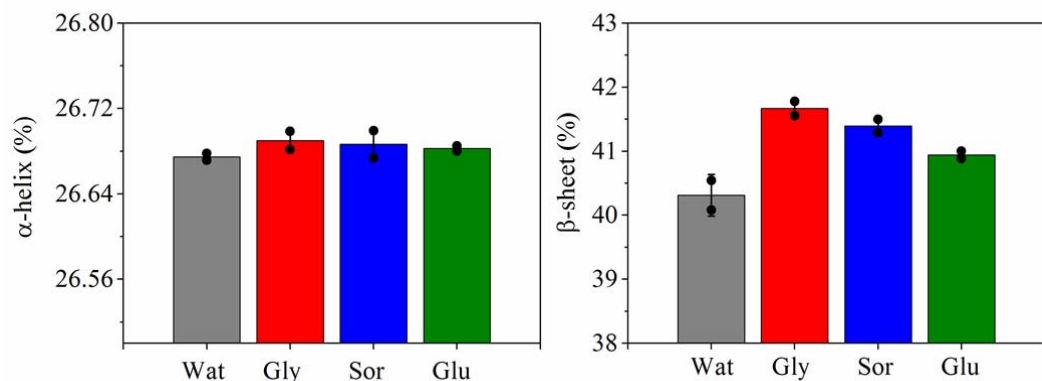

33

34 Supplementary Figure 3. Secondary structure percentage of GB3 in water and in the  
 35 presence of different osmolytes. The percentages were calculated and averaged from 2  
 36 MD trajectories.

37

38

### 39 **Supplementary Tables**

40 Supplementary Table 1. Through hydrogen bond J-coupling,  $^3J_{NC'}$  measured for  
 41 GB3 and TTHA at different osmolyte concentrations.<sup>a</sup>

| GB3            |     |          |       |        |          |       |        |         |       |        |
|----------------|-----|----------|-------|--------|----------|-------|--------|---------|-------|--------|
|                |     | Glycerol |       |        | Sorbitol |       |        | Glucose |       |        |
| H <sup>N</sup> | C'  | 0g/L     | 80g/L | 160g/L | 0g/L     | 80g/L | 160g/L | 0g/L    | 80g/L | 160g/L |
| Y3             | T18 | 0.647    | 0.648 | 0.650  | 0.647    | 0.655 | 0.659  | 0.652   | 0.656 | 0.660  |
| K4             | K50 | 0.399    | 0.404 | 0.411  | 0.398    | 0.402 | 0.405  | 0.400   | 0.405 | 0.410  |
| L5             | T16 | 0.681    | 0.684 | 0.688  | 0.681    | 0.688 | 0.691  | 0.689   | 0.692 | 0.694  |
| I7             | G14 | 0.554    | 0.564 | 0.579  | 0.557    | 0.563 | 0.573  | 0.561   | 0.562 | 0.574  |
| N8             | T44 | 0.605    | 0.617 | 0.633  | 0.604    | 0.612 | 0.617  | 0.611   | 0.586 | 0.591  |
| G9             | L12 | 0.367    | 0.375 | 0.375  | 0.374    | 0.384 | 0.384  | 0.368   | 0.379 | 0.372  |
| G14            | I7  | 0.230    | 0.240 | 0.255  | 0.232    | 0.236 | 0.243  | 0.231   | 0.242 | 0.250  |
| T16            | L5  | 0.404    | 0.405 | 0.405  | 0.406    | 0.409 | 0.403  | 0.410   | 0.408 | 0.413  |
| T18            | Y3  | 0.383    | 0.387 | 0.386  | 0.386    | 0.388 | 0.389  | 0.390   | 0.386 | 0.390  |
| A20            | M1  | 0.472    | 0.473 | 0.477  | 0.471    | 0.477 | 0.476  | 0.469   | 0.472 | 0.477  |
| K28            | E24 | 0.189    | 0.192 | 0.196  | 0.186    | 0.194 | 0.189  | 0.192   | 0.198 | 0.200  |
| A29            | T25 | 0.163    | 0.173 | 0.187  | 0.166    | 0.171 | 0.172  | 0.172   | 0.172 | 0.153  |
| F30            | A26 | 0.558    | 0.562 | 0.561  | 0.562    | 0.562 | 0.567  | 0.563   | 0.558 | 0.570  |
| K31            | E27 | 0.654    | 0.660 | 0.672  | 0.658    | 0.666 | 0.668  | 0.664   | 0.668 | 0.678  |
| Q32            | K28 | 0.207    | 0.212 | 0.220  | 0.205    | 0.206 | 0.207  | 0.208   | 0.215 | 0.213  |
| Y33            | A29 | 0.264    | 0.267 | 0.275  | 0.265    | 0.262 | 0.261  | 0.262   | 0.254 | 0.268  |
| A34            | F30 | 0.537    | 0.542 | 0.550  | 0.536    | 0.544 | 0.547  | 0.541   | 0.547 | 0.557  |
| D36            | Q32 | 0.561    | 0.567 | 0.573  | 0.562    | 0.570 | 0.567  | 0.565   | 0.572 | 0.575  |
| N37            | Y33 | 0.176    | 0.175 | 0.178  | 0.173    | 0.175 | 0.163  | 0.166   | 0.166 | 0.158  |
| V39            | A34 | 0.318    | 0.325 | 0.334  | 0.325    | 0.333 | 0.338  | 0.322   | 0.333 | 0.352  |
| V42            | T55 | 0.425    | 0.436 | 0.441  | 0.428    | 0.437 | 0.441  | 0.428   | 0.434 | 0.443  |

|      |     |       |       |       |       |       |       |       |       |       |
|------|-----|-------|-------|-------|-------|-------|-------|-------|-------|-------|
| T44  | T53 | 0.553 | 0.550 | 0.546 | 0.548 | 0.552 | 0.551 | 0.552 | 0.557 | 0.558 |
| T51  | D46 | 0.181 | 0.186 | 0.187 | 0.188 | 0.192 | 0.193 | 0.191 | 0.190 | 0.194 |
| F52  | K4  | 0.761 | 0.773 | 0.793 | 0.765 | 0.771 | 0.777 | 0.765 | 0.772 | 0.793 |
| T53  | T44 | 0.517 | 0.523 | 0.525 | 0.519 | 0.527 | 0.529 | 0.521 | 0.525 | 0.535 |
| V54  | V6  | 0.462 | 0.463 | 0.465 | 0.466 | 0.469 | 0.473 | 0.468 | 0.465 | 0.477 |
| T55  | V42 | 0.408 | 0.415 | 0.424 | 0.416 | 0.420 | 0.425 | 0.424 | 0.419 | 0.422 |
| TTHA |     |       |       |       |       |       |       |       |       |       |
| E7   | K61 | 0.625 | 0.630 | 0.645 | 0.616 | 0.625 | 0.642 | 0.626 | 0.632 | 0.648 |
| V18  | S14 | 0.455 | 0.463 | 0.462 | 0.456 | 0.462 | 0.467 | 0.457 | 0.460 | 0.467 |
| K20  | M16 | 0.416 | 0.420 | 0.418 | 0.420 | 0.423 | 0.425 | 0.416 | 0.418 | 0.429 |
| A21  | A17 | 0.251 | 0.259 | 0.260 | 0.248 | 0.252 | 0.259 | 0.246 | 0.248 | 0.250 |
| L22  | V18 | 0.398 | 0.395 | 0.388 | 0.401 | 0.403 | 0.403 | 0.399 | 0.401 | 0.406 |
| K23  | T19 | 0.357 | 0.350 | 0.352 | 0.362 | 0.355 | 0.352 | 0.361 | 0.362 | 0.363 |
| S34  | E39 | 0.698 | 0.710 | 0.707 | 0.704 | 0.718 | 0.724 | 0.708 | 0.715 | 0.717 |
| A40  | L4  | 0.609 | 0.605 | 0.598 | 0.618 | 0.614 | 0.608 | 0.617 | 0.612 | 0.606 |
| L41  | E32 | 0.726 | 0.739 | 0.743 | 0.730 | 0.742 | 0.750 | 0.732 | 0.739 | 0.748 |
| E43  | K30 | 0.550 | 0.569 | 0.557 | 0.556 | 0.565 | 0.582 | 0.550 | 0.562 | 0.577 |
| T45  | G27 | 0.235 | 0.241 | 0.249 | 0.246 | 0.248 | 0.253 | 0.243 | 0.245 | 0.259 |
| V52  | P48 | 0.295 | 0.295 | 0.298 | 0.295 | 0.291 | 0.295 | 0.298 | 0.298 | 0.299 |
| E56  | V52 | 0.460 | 0.462 | 0.467 | 0.460 | 0.463 | 0.468 | 0.459 | 0.464 | 0.472 |
| K61  | E7  | 0.173 | 0.174 | 0.176 | 0.175 | 0.173 | 0.178 | 0.173 | 0.178 | 0.175 |
| L65  | K3  | 0.480 | 0.486 | 0.491 | 0.482 | 0.490 | 0.493 | 0.485 | 0.488 | 0.490 |

42 <sup>a</sup>. <sup>3h</sup>J<sub>NC</sub> is the average from duplicate measurements. The measurement error of  
43 <sup>3h</sup>J<sub>NC</sub> is 0.004–0.006 Hz estimated from the standard deviation of <sup>3h</sup>J<sub>NC</sub> in the two  
44 measurements.

45  
46

47 Supplementary Table 2. Statistics of hydrogen bonds in different simulation systems

| Simulation systems | Number of h-bonds (GB3-water) | Number of h-bonds (GB3-osmolyte) | Total h-bonds | GB3-osmolyte h-bond percentage | <sup>3h</sup> J <sub>NC</sub> |
|--------------------|-------------------------------|----------------------------------|---------------|--------------------------------|-------------------------------|
| GB3                | 150.5±0.3                     | 0                                | 150.5±0.4     | 0                              | 0.4748±0.0008                 |
| GB3/glycerol       | 105.5±0.1                     | 35.9±0.1                         | 141.4±0.1     | 25%                            | 0.4889±0.0005                 |
| GB3/sorbitol       | 112.6±0.6                     | 32.2±0.03                        | 144.8±0.6     | 22%                            | 0.4871±0.0009                 |
| GB3/glucose        | 113.8±0.5                     | 31.0±0.01                        | 144.8±0.5     | 21%                            | 0.4831±0.0002                 |

48  
49  
50  
51

52

53 Supplementary Table 3. H/D exchange rates<sup>a</sup> for PDZ3 in the PDZ3-CRIPT  
54 complex.

| Res.              | Buffer      | Glycerol    | Sorbitol    | Glucose     |
|-------------------|-------------|-------------|-------------|-------------|
| G303 <sup>1</sup> | N/A         | N/A         | N/A         | N/A         |
| E304              | f           | f           | f           | f           |
| E305              | f           | f           | f           | f           |
| D306              | f           | f           | f           | f           |
| I307              | f           | f           | f           | f           |
| P308              |             |             |             |             |
| R309              | f           | f           | f           | f           |
| E310              | 1.444±0.073 | 1.549±0.162 | 0.899±0.119 | 1.125±0.336 |
| P311              |             |             |             |             |
| R312              | 1.057±0.045 | 0.545±0.197 | 0.596±0.006 | 0.537±0.066 |
| R313              | f           | f           | f           | f           |
| I314              | 0.007±0.001 | 0.003±0.001 | 0.007±0.001 | 0.003±0.001 |
| V315              | 1.558±0.121 | 1.238±0.509 | 1.152±0.041 | 1.129±0.180 |
| I316              | s           | s           | s           | s           |
| H317              | f           | f           | f           | f           |
| R318              | f           | f           | f           | f           |
| G319              | f           | f           | f           | f           |
| S320 <sup>1</sup> | N/A         | N/A         | N/A         | N/A         |
| T321              | f           | f           | f           | f           |
| G322              | f           | f           | f           | f           |
| L323 <sup>1</sup> | N/A         | N/A         | N/A         | N/A         |
| G324              | f           | f           | f           | f           |
| F325              | f           | f           | f           | f           |
| N326 <sup>2</sup> | N/A         | N/A         | N/A         | N/A         |
| I327              | f           | f           | f           | f           |
| I328              | 0.020±0.007 | 0.008±0.004 | 0.007±0.004 | 0.005±0.005 |
| G329 <sup>1</sup> | N/A         | N/A         | N/A         | N/A         |
| G330              | f           | f           | f           | f           |
| E331              | f           | f           | f           | f           |
| D332              | f           | f           | f           | f           |
| G333              | f           | f           | f           | f           |
| E334 <sup>1</sup> | N/A         | N/A         | N/A         | N/A         |
| G335              | f           | f           | f           | f           |
| I336              | f           | f           | f           | f           |
| F337 <sup>2</sup> | N/A         | N/A         | N/A         | N/A         |
| I338              | f           | f           | f           | f           |
| S339 <sup>1</sup> | N/A         | N/A         | N/A         | N/A         |
| F340              | 0.916±0.136 | 0.760±0.025 | 0.669±0.008 | 0.531±0.037 |
| I341              | f           | f           | f           | f           |

|                   |              |             |             |             |
|-------------------|--------------|-------------|-------------|-------------|
| L342              | 0.051±0.009  | 0.047±0.031 | 0.025±0.001 | 0.025±0.006 |
| A343 <sup>1</sup> | N/A          | N/A         | N/A         | N/A         |
| G344              | f            | f           | f           | f           |
| G345              | 0.725±0.132  | 0.425±0.091 | 0.371±0.015 | 0.409±0.062 |
| P346              |              |             |             |             |
| A347              | 1.094±0.169  | 0.680±0.110 | 0.588±0.062 | 0.538±0.038 |
| D348              | 0.553±0.063  | 0.354±0.025 | 0.312±0.019 | 0.337±0.078 |
| L349              | 0.976±0.158  | 0.664±0.022 | 0.576±0.047 | 0.534±0.136 |
| S350              | f            | f           | f           | f           |
| G351              | f            | f           | f           | f           |
| E352              | f            | f           | f           | f           |
| L353 <sup>1</sup> | N/A          | N/A         | N/A         | N/A         |
| R354              | f            | f           | f           | f           |
| K355              | f            | f           | f           | f           |
| G356 <sup>2</sup> | N/A          | N/A         | N/A         | N/A         |
| D357              | s            | s           | s           | s           |
| Q358              | 0.007±0.001  | 0.005±0.001 | 0.006±0.001 | 0.006±0.002 |
| I359              | s            | s           | s           | s           |
| L360              | s            | s           | s           | s           |
| S361              | s            | s           | s           | s           |
| V362              | s            | s           | s           | s           |
| N363              | f            | f           | f           | f           |
| G364              | f            | f           | f           | f           |
| V365              | 0.006±0.001  | 0.004±0.000 | 0.005±0.001 | 0.005±0.001 |
| D366              | f            | f           | f           | f           |
| L367              | 0.026±0.004  | 0.024±0.000 | 0.020±0.001 | 0.020±0.002 |
| R368              | 1.451±0.112  | 1.422±0.056 | 1.056±0.130 | 1.677±0.250 |
| N369              | f            | f           | f           | f           |
| A370              | f            | f           | f           | f           |
| S371              | f            | f           | f           | f           |
| H372              | f            | f           | f           | f           |
| E373              | f            | f           | f           | f           |
| Q374              | f            | f           | f           | f           |
| A375              | 0.008±0.003  | 0.005±0.004 | 0.003±0.001 | 0.002±0.002 |
| A376              | 0.0105±0.002 | 0.005±0.002 | 0.004±0.001 | 0.005±0.000 |
| I377              | 0.0105±0.004 | 0.005±0.003 | 0.004±0.001 | 0.006±0.003 |
| A378              | s            | s           | s           | s           |
| L379              | 0.004±0.002  | 0.002±0.002 | 0.004±0.001 | 0.002±0.001 |
| K380              | 0.010±0.001  | 0.004±0.004 | 0.004±0.001 | 0.004±0.003 |
| N381              | f            | f           | f           | f           |
| A382              | f            | f           | f           | f           |
| G383              | f            | f           | f           | f           |
| Q384              | f            | f           | f           | f           |

|                   |             |             |             |             |
|-------------------|-------------|-------------|-------------|-------------|
| T385              | f           | f           | f           | f           |
| V386              | 0.080±0.003 | 0.059±0.004 | 0.053±0.001 | 0.055±0.001 |
| T387 <sup>2</sup> | N/A         | N/A         | N/A         | N/A         |
| I388              | s           | s           | s           | s           |
| I389              | s           | s           | s           | s           |
| A390              | s           | s           | s           | s           |
| Q391              | s           | s           | s           | s           |
| Y392              | f           | f           | f           | f           |
| K393              | f           | f           | f           | f           |
| P394              |             |             |             |             |
| E395              | f           | f           | f           | f           |

55 <sup>a</sup>. The error is estimated from duplicate measurements.

56 <sup>1</sup>. The exchange rates are not available due to overlap.

57 <sup>2</sup>. The residue has no signal on hsqc spectrum.

58 f. The exchange rates are too fast to be measured.

59 s. The exchange rates are too slow to be measured.

60

61

62 Supplementary Table 4. Number of water and glycerol molecules around backbone

63 C $\alpha$  of GB3 from MD simulations.

| Res | Water    | Glycerol |
|-----|----------|----------|
| 1   | 1.319072 | 0.542383 |
| 2   | 0.062975 | 0.097361 |
| 3   | 0.052379 | 0.04938  |
| 4   | 0.004398 | 0.02439  |
| 5   | 0        | 0        |
| 6   | 0.0004   | 0.0002   |
| 7   | 0.001    | 0        |
| 8   | 0.109156 | 0.054778 |
| 9   | 0.412435 | 0.068373 |
| 10  | 0.152139 | 0.247901 |
| 11  | 0.236705 | 0.288884 |
| 12  | 0.195122 | 0.238505 |
| 13  | 0.089764 | 0.178329 |
| 14  | 0.965214 | 0.851459 |
| 15  | 0.010196 | 0.138545 |
| 16  | 0.408237 | 0.30028  |
| 17  | 0.006597 | 0.061176 |
| 18  | 0.348061 | 0.316273 |
| 19  | 0.038784 | 0.106757 |
| 20  | 0.531387 | 0.402439 |
| 21  | 0.12575  | 0.27409  |
| 22  | 0.210916 | 0.213515 |

|    |          |          |
|----|----------|----------|
| 23 | 0.012595 | 0.097561 |
| 24 | 0.264694 | 0.32467  |
| 25 | 0.181327 | 0.113754 |
| 26 | 0.005398 | 0.0002   |
| 27 | 0.0012   | 0.0004   |
| 28 | 0.101359 | 0.136146 |
| 29 | 0.262495 | 0.416833 |
| 30 | 0.0012   | 0.003399 |
| 31 | 0.05018  | 0.105558 |
| 32 | 0.089964 | 0.148141 |
| 33 | 0.17513  | 0.2499   |
| 34 | 0.0012   | 0.004398 |
| 35 | 0.218113 | 0.270692 |
| 36 | 0.332867 | 0.37585  |
| 37 | 0.198721 | 0.334466 |
| 38 | 0.873651 | 0.704318 |
| 39 | 0.09916  | 0.076569 |
| 40 | 0.371052 | 0.435226 |
| 41 | 0.29928  | 0.290084 |
| 42 | 0.213115 | 0.197321 |
| 43 | 0.021192 | 0.180128 |
| 44 | 0.382247 | 0.5002   |
| 45 | 0.045982 | 0.179328 |
| 46 | 0.348461 | 0.378848 |
| 47 | 0.015994 | 0.14994  |
| 48 | 0.305278 | 0.473611 |
| 49 | 0.180928 | 0.262495 |
| 50 | 0.0012   | 0.011196 |
| 51 | 0.001799 | 0.0006   |
| 52 | 0.012995 | 0        |
| 53 | 0.0004   | 0.001999 |
| 54 | 0.039184 | 0        |
| 55 | 0.008796 | 0.004798 |
| 56 | 0.383047 | 0.269892 |

64

65

66

67

68

69



70 Supplementary Table 5. Number of molecules in MD simulation systems.

| Simulation systems | Number of osmolytes | Number of waters | Box size (nm)  | Mass weight of osmolytes (g/L) |
|--------------------|---------------------|------------------|----------------|--------------------------------|
| GB3                | 0                   | 3373             | 4.76×4.76×4.76 | 0                              |
| GB3/glycerol       | 361                 | 1898             | 4.77×4.82×4.77 | 503                            |
| GB3/sorbitol       | 184                 | 1976             | 4.73×4.73×4.73 | 526                            |
| GB3/glucose        | 185                 | 2043             | 4.74×4.70×4.71 | 527                            |

71

72
